# Supplementary material for: Dynamics of plasma biomarkers in Down syndrome: the relative levels of Aβ42 decrease with age, whereas NT1 tau and NfL increase
Source: Springer Nature journal article supplement (doi:10.1186/s13195-020-00593-7), 2020-03-19

# Supplemental Figure 1

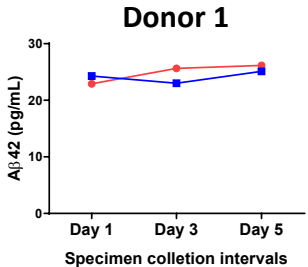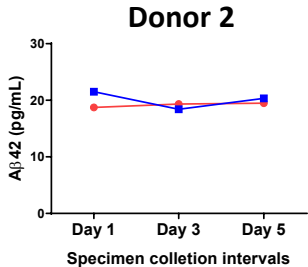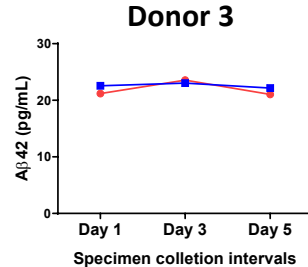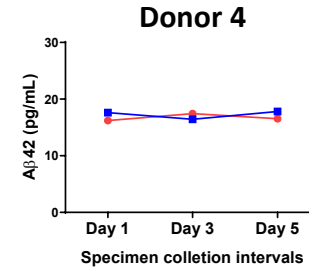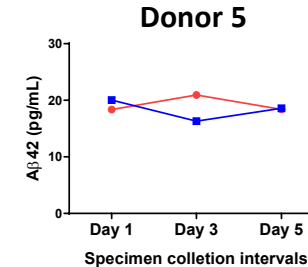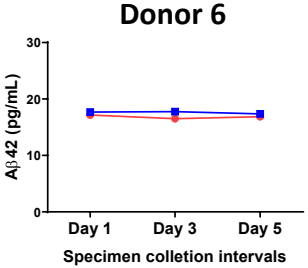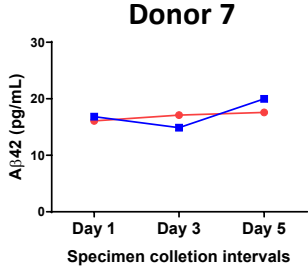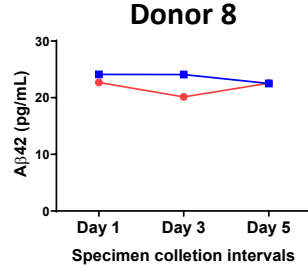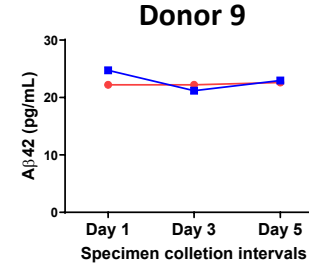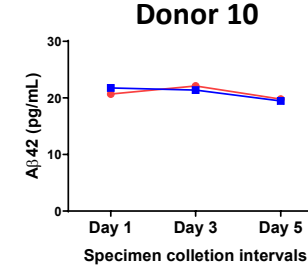

# Supplemental Figure 2

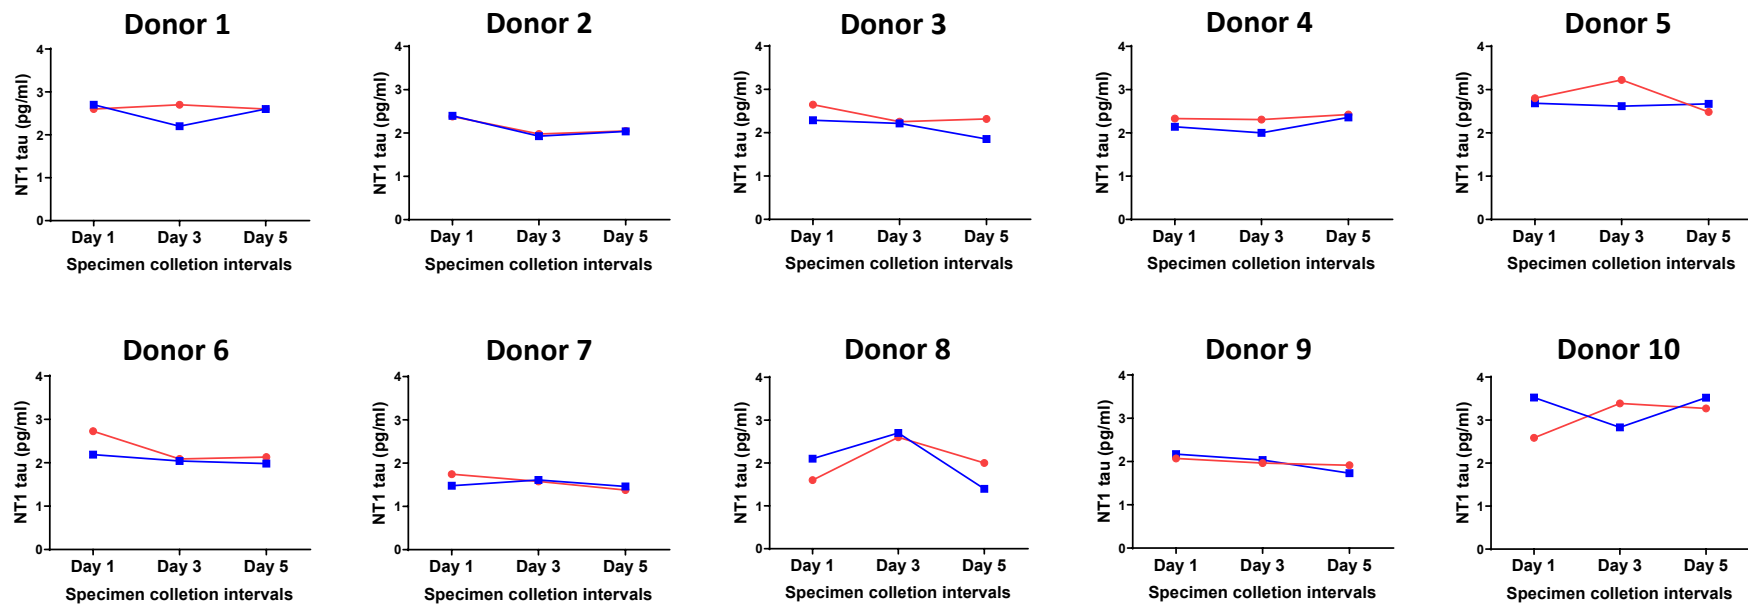

# Supplemental Figure 3

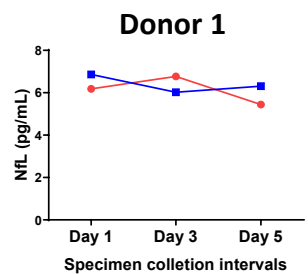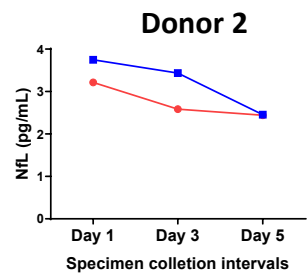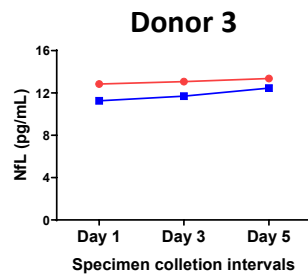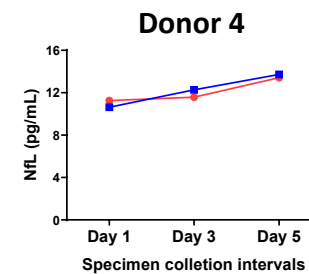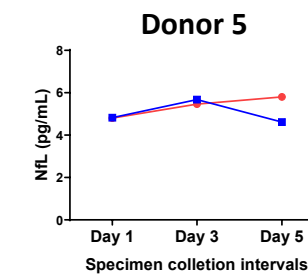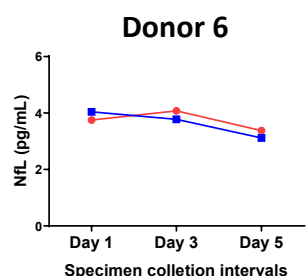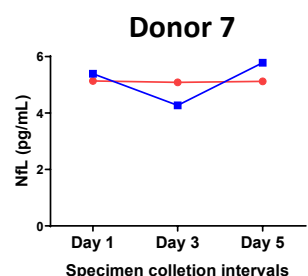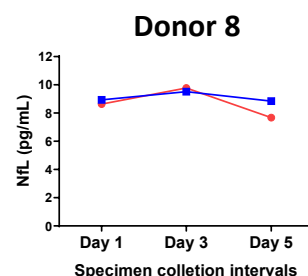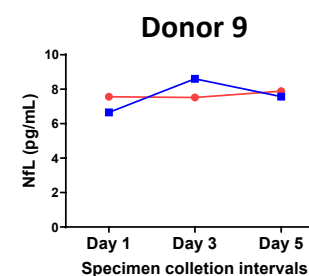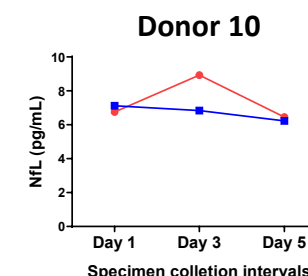

# Supplemental Figure 4

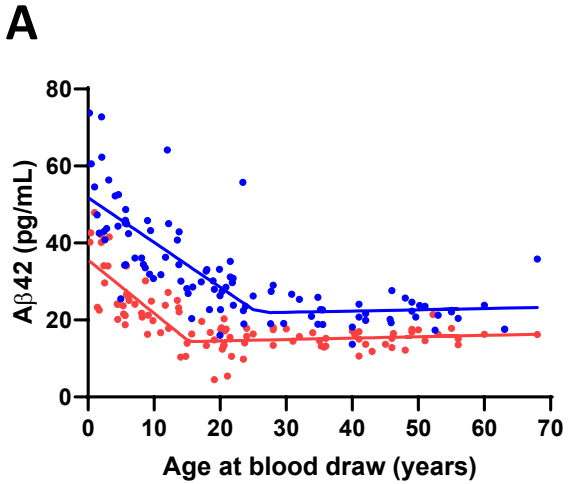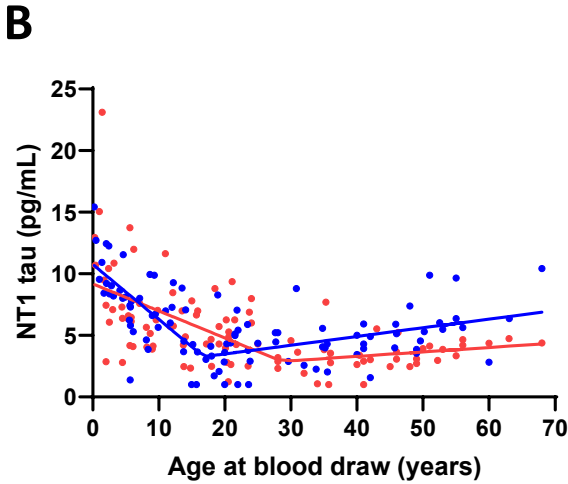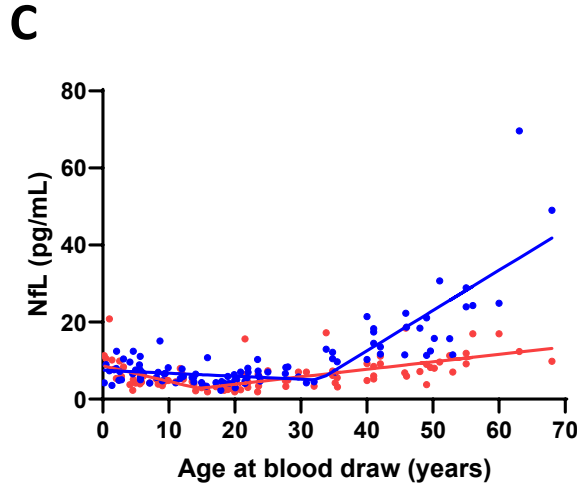

Supplement: MOESM2 [file 17815990]
